# Supplementary material for: Assessing the cost barrier for small and medium food processing businesses to meet Preventive Controls for Human Foods standards
Source: PubMed Central journal article supplement (PMC11398691; doi:10.1371/journal.pone.0306618), 2024-09-13
Supplement: pone.0306618.s005.pdf [file pone.0306618.s005.pdf]

**S1 Table. Knowledge Evaluation Areas.**

| Knowledge Evaluation Areas                                                          |
|-------------------------------------------------------------------------------------|
| Non-Food Safety Areas                                                               |
| Estimating costs of compliance and financial risk of non-compliance                 |
| The steps that I need to take within my facility to comply with Preventive Controls |
| 3rd Party Auditing                                                                  |
| Food Safety Areas                                                                   |
| Drawing a process flow diagram                                                      |
| Conducting a Hazard Analysis                                                        |
| Identify verification activities                                                    |
| Record Keeping                                                                      |
| The steps involved in a Food Safety Plan                                            |
| Developing a recall plan                                                            |
| The Preventive Controls Rule                                                        |
| The FDA's Food Modernization Act                                                    |
| Good Manufacturing Practices                                                        |
| Good Sanitation Practices                                                           |
| Writing a product and process description                                           |

Respondents instructed to identify how knowledgeable they are about the topic areas on a Likert scale from 1-5.
