# Supplementary material for: Assessing the cost barrier for small and medium food processing businesses to meet Preventive Controls for Human Foods standards
Source: PubMed Central journal article supplement (PMC11398691; doi:10.1371/journal.pone.0306618), 2024-09-13
Supplement: pone.0306618.s006.pdf [file pone.0306618.s006.pdf]

**S2 Table. T-Tests of Differences between Pre-Webinar Baseline Self-Reported Knowledge by Cohort.**

| Perceived Knowledge Areas    | Webinar Only |          | Webinar to PCQI |          | <i>t</i> | <i>p</i> |
|------------------------------|--------------|----------|-----------------|----------|----------|----------|
|                              | Mean         | St. Dev. | Mean            | St. Dev. |          |          |
| <b>Non-Food Safety Areas</b> |              |          |                 |          |          |          |
| Audit                        | 2.2          | 1.0      | 2.2             | 1.1      | -0.1     | 0.9      |
| PC Steps                     | 2.5          | 1.0      | 2.8             | 0.9      | -1.1     | 0.3      |
| Cost                         | 2.0          | 1.0      | 1.9             | 0.9      | 0.5      | 0.6      |
| <b>Food Safety Areas</b>     |              |          |                 |          |          |          |
| Food Risk                    | 2.7          | 1.2      | 2.8             | 0.8      | -0.3     | 0.7      |
| FSMA                         | 2.3          | 0.9      | 2.6             | 0.9      | -1.0     | 0.3      |
| Hazards                      | 2.4          | 1.0      | 2.3             | 1.0      | 0.3      | 0.8      |
| Recall                       | 2.6          | 1.2      | 2.9             | 1.4      | -0.8     | 0.4      |
| Verification                 | 2.2          | 1.0      | 2.1             | 0.9      | 0.0      | 1.0      |
| Process Flow                 | 2.5          | 1.2      | 2.4             | 1.1      | 0.5      | 0.6      |
| Product Description          | 2.6          | 1.1      | 2.6             | 1.0      | 0.2      | 0.9      |
| FSP Steps                    | 2.6          | 1.0      | 3.1             | 1.0      | -1.8     | 0.1      |
| GMP                          | 2.9          | 1.1      | 2.9             | 1.0      | 0.2      | 0.8      |
| GSP                          | 3.6          | 0.9      | 3.8             | 0.9      | -0.8     | 0.4      |
| PC Rule                      | 2.1          | 1.0      | 2.0             | 0.7      | 0.4      | 0.7      |
| Records                      | 3.2          | 1.1      | 3.1             | 0.7      | 0.1      | 0.9      |
|                              | <i>N=59</i>  |          | <i>N=21</i>     |          |          |          |

Note: Statistical significance denoted by \*, resulting from unequal t-test with  $p > 0.05$ .
